# Supplementary material for: Epidemiology and Mortality of Cryptococcal Disease in Guatemala: Two-Year Results of a Cryptococcal Antigen Screening Program
Source: MDPI journal article supplement (doi:10.3390/microorganisms10071388), 2022-07-10
Supplement: s1 [file s1]

## Supplementary Material

**Table S1. Cryptococcal antigenemia prevalence studies in LATAM**

| Author                                                        | Years of study                   | Enrolled patients | Country   | Criteria for serum CrAg report                                                                                  | Serum CrAg positivity |
|---------------------------------------------------------------|----------------------------------|-------------------|-----------|-----------------------------------------------------------------------------------------------------------------|-----------------------|
| <b>Patients with <math>\leq 100</math> CD4/mm<sup>3</sup></b> |                                  |                   |           |                                                                                                                 |                       |
| Santa Barbara Borges, M., <i>et al.</i> [9]                   | 2015-2018                        | 214               | Brazil    | Patients with $\leq 100$ cells/mm <sup>3</sup> without previous cryptococcal disease and regardless of symptoms | 7.5%                  |
| Frola, C., <i>et al.</i> [10]                                 | April 2014 to January 2015       | 123               | Argentina | HIV patients with CD4 $\leq 100$ cells/mm <sup>3</sup> within 3 months or WHO stage III/IV                      | 8.1%                  |
| C. Zuniga-Moya [12]                                           | 2017-2018                        | 220               | Honduras  | HIV patients who had CD4 $\leq 100$ cells/mm <sup>3</sup>                                                       | 12.7%                 |
| Vidal, J.E., <i>et al.</i> [12] <sup>1</sup>                  | ----                             | 368               | Perú      | ART-naïve adults with CD4 of $\leq 100$ cell/mm <sup>3</sup> without a history of cryptococcosis                | 3.6%                  |
| <b>Patients with <math>&lt; 200</math> CD4/mm<sup>3</sup></b> |                                  |                   |           |                                                                                                                 |                       |
| Santa Barbara Borges, M., <i>et al.</i> [9]                   | 2015-2018                        | 214               | Brazil    | AHD without previous cryptococcal disease and regardless of symptoms                                            | 7.9%                  |
| De F. Ferreira, M., <i>et al.</i> [13]                        | 2015                             | 89                | Brazil    | hospitalized HIV patients with AHD                                                                              | 11.2%                 |
| Vidal, J.E., <i>et al.</i> [14]                               | November 2014 to 30 October 2015 | 163               | Brazil    | hospitalized HIV patients with AHD without symptomatic meningitis                                               | 3.1%                  |

<sup>1</sup> This study reported data of another program \*serum sample

**Table S2. Estimates of CrAg in people living with HIV in Latin America**

**Formulas used in this analysis:**

- A. *Newly HIV diagnosed at risk of cryptococcal disease with AHD:* [(New HIV diagnoses\*) (% AHD reported\*)] (CrAg=8.7%)
- B. *Newly HIV diagnosed at risk of cryptococcal disease with <350 CD4/mm<sup>3</sup>:* [(New HIV diagnoses\*) (55%)] (CrAg=6.3%)
- C. *Abandon the ART:* [(Estimated No. Of people NOT on ART) (20%)] (CrAg=8.7%)
- D. *On ART:* [(Estimated No. NOT virally suppressed) (20%)] (CrAg=8.7%)

| Countries          | PLWH 2020* | New HIV diagnoses* | % AHD reported* | % PLWH who are on ART* | Estimated No. Of people NOT on ART | %PLWH who are virally suppressed* | Estimated No. NOT virally suppressed |
|--------------------|------------|--------------------|-----------------|------------------------|------------------------------------|-----------------------------------|--------------------------------------|
| Argentina          | 140,000    | 5,600              | 24              | 65                     | 49000                              | 55 <sup>¥</sup>                   | 63000                                |
| Bolivia            | 17,000     | 870                | 30 <sup>¥</sup> | 68                     | 5440                               | 55 <sup>¥</sup>                   | 7650                                 |
| Brazil             | 930,000    | 48,000             | 27              | 70                     | 279000                             | 66                                | 316200                               |
| Chile              | 77,000     | 5,000              | 30              | 70                     | 23100                              | 63                                | 28490                                |
| Colombia           | 180,000    | 9,300              | 35              | 64                     | 64800                              | 57                                | 77400                                |
| Costa Rica         | 16,000     | 1,700              | 30 <sup>¥</sup> | 53                     | 7520                               | 55 <sup>¥</sup>                   | 7200                                 |
| Ecuador            | 45,000     | 2,100              | 18              | 76                     | 10800                              | 55 <sup>¥</sup>                   | 20250                                |
| El Salvador        | 25,000     | 850                | 25              | 56                     | 11000                              | 49                                | 12750                                |
| Guatemala          | 33,000     | 770                | 52*             | 64                     | 11880                              | 56                                | 14520                                |
| Honduras           | 22,000     | 710                | 30 <sup>¥</sup> | 54                     | 10120                              | 31                                | 15180                                |
| Mexico             | 340,000    | 20,000             | 39              | 55                     | 153000                             | 49                                | 173400                               |
| Nicaragua          | 12,000     | 740                | 22              | 50                     | 6000                               | 55 <sup>¥</sup>                   | 5400                                 |
| Panama             | 31,000     | 1,800              | 38              | 51                     | 15190                              | 53                                | 14570                                |
| Paraguay           | 19,000     | 890                | 44              | 53                     | 8930                               | 44                                | 10640                                |
| Peru               | 91,000     | 4,100              | 16              | 79                     | 19110                              | 55 <sup>¥</sup>                   | 40950                                |
| Dominican Republic | 75,000     | 3,400              | 30 <sup>¥</sup> | 51                     | 36750                              | 55 <sup>¥</sup>                   | 33750                                |
| Uruguay            | 12,000     | 1,000              | 10              | 81                     | 2280                               | 79                                | 2520                                 |
| Venezuela          | 100,000    | 2,200              | 30 <sup>¥</sup> | 55                     | 45000                              | 55 <sup>¥</sup>                   | 45000                                |

\*UNAIDS 2020 Data<sup>1</sup>; \*Guatemala data<sup>2</sup>; ¥ data based on the overall average (% of AHD= 30%; %virally suppressed=55%)

<sup>1</sup> Unaid. (n.d.). UNAIDS data 2021.

<sup>2</sup> Medina, N., Alastruey-Izquierdo, A., Bonilla, O., Gamboa, O., Mercado, D., Pérez, J. C., Salazar, L. R., Arathoon, E., Denning, D. W., & Luis Rodriguez-Tudela, J. (2021). A Rapid Screening Program for Histoplasmosis, Tuberculosis, and Cryptococcosis Reduces Mortality in HIV Patients from Guatemala.
